1 **Intergenerational paternal effect of adult density in *Drosophila melanogaster***

2 Purbasha Dasgupta<sup>1†</sup>, purbasha17@iiserbpr.ac.in

3 Saubhik Sarkar<sup>1†</sup>, sarkar.saubhik.sarkar@gmail.com

4 Akankshya A. Das<sup>2</sup>, ayesa692@gmail.com

5 Tanya Verma<sup>1</sup>, tanya17@iiserbpr.ac.in

6 Bodhisatta Nandy<sup>1\*</sup>, nandy@iiserbpr.ac.in

7

8 † Equal contribution

9 \* Corresponding author

10 Present address:

11 1. Indian Institute of Science Education and Research Berhampur

12 Berhampur Transit Campus, Govt. ITI Building,

13 NH 59, Engineering School Junction, Ganjam, Berhampur 760 010, Odisha, India.

14 Contact number: +91-680-222 7755

15

16 2. Department of Zoology, Banaras Hindu University, Varanasi – 221005, Uttar Pradesh, India.

17

18 **Running title:** Paternal density effect on progeny fitness

19 **Word count:** 7,083 (including references, acknowledgements, authors' contributions, table and figure  
20 captions)

21 **Figure count:** 3

22 **Table count:** 1

23

24

25 **Abstract:**

- 26 1. Notwithstanding recent evidences, paternal environment is thought to be a potential but  
27 unlikely source of fitness variation that can affect trait evolution. Here we studied  
28 intergenerational effects of males' exposure to varying adult density in *Drosophila*  
29 *melanogaster* laboratory populations.
- 30 2. We held sires at normal (N), medium (M) and high (H) adult densities for two days before  
31 allowing them to mate with virgin females. This treatment did not introduce selection through  
32 differential mortality. Further, we randomly paired males and females and allowed a single  
33 round of mating between the sires and the dams. We then collected eggs from the dams and  
34 measured the egg size. Finally, we investigated the effect of the paternal treatment on juvenile  
35 and adult (male) fitness components.
- 36 3. We found a significant treatment effect on juvenile competitive ability where the progeny  
37 sired by the H-males had higher competitive ability. Since we did not find the treatment to  
38 affect egg size, this effect is unlikely to be mediated through variation in female provisioning.
- 39 4. Male fitness components were also found to have a significant treatment effect: M-sons had  
40 lower dry weight at eclosion, higher mating latency and lower competitive mating success.
- 41 5. While being the first study to show both adaptive and non-adaptive effect of the paternal  
42 density in *Drosophila*, our results highlight the importance of considering paternal  
43 environment as important source of fitness variation.

44 **Key words:** Sire effect, juvenile competitive fitness, mating latency, male reproductive success,  
45 crowding adaptation

46

47 **Introduction:**

48 Parental environment has the potential to influence offspring traits and fitness through  
49 intergenerational effects (and more stable transgenerational effects, see Dias and Ressler 2014 for the  
50 distinction between trans and intergenerational effects). While it can potentially pass on deleterious  
51 effects of different components of the environment to the following generation (Yahuda et al. 2000),  
52 intergenerational effect can also be adaptive, especially under fluctuating environment (Bonduriansky  
53 and Day 2009). Among the myriad components of an organism's ecology, few factors are as variable  
54 as density and nutritional availability. Both have been recently found to have intergenerational effects,  
55 especially through the maternal route (i.e., maternal effect) in a wide variety of organisms (Mousseau  
56 & Fox 1998). There is a growing body of evidence showing the importance of the intergenerational  
57 effect of paternal nutrition, social experience and density on fitness related traits of the offspring  
58 (Friberg et al., 2012; Adler & Bonduriansky, 2013; Crean et al., 2013, Dasgupta et al. 2016).

59 However, the prevalence and adaptive significance of such paternal effect is yet to be ascertained.

60

61 There are many reports of environment dependent maternal effect mediated through variation in  
62 maternal provisioning in egg/offspring (Rossiter, 1996; Mousseau & Fox, 1998). For example,  
63 females living under high density may suffer from adverse effects of crowding (such as, malnutrition)  
64 and may therefore struggle to allocate resources in maternal provisioning either in the form of stored  
65 resources in egg or lactation, which in turn may lead to poor quality progeny (Christian & Lemunyan,  
66 1958). Alternatively, females raised in high density may strategically produce fewer eggs/progeny  
67 while investing more resources (e.g., yolk) in each of them – thereby giving the progeny a better start  
68 for the impending challenges of crowding (Prasad et al., 2003; Holbrook & Schal, 2004; Mitchell &  
69 Read, 2005; Vijendravarma et al. 2010). Generally, under fluctuating environmental conditions, such  
70 parental ability to optimize offspring phenotype has been conjectured to be adaptive (Bonduriansky &  
71 Day, 2009; Kuijper & Hoyle, 2015). For example, Guppy (*Poecilia reticulata*) females were found to  
72 produce larger offspring (a) under food limitation (Reznick & Reznick, 1993) and (b) when they  
73 experienced high level of competition – priming the offspring for better competitive ability (Bashey,  
74 2006). The larger eggs produced by *D. melanogaster* females that grew in nutritionally impoverished

75 food, survive (egg to adult survivorship) better in impoverished food and give rise to smaller adults  
76 (Vijendravarma et al., 2010). In contrast, Valtonen et al. (2012) found *D. melanogaster* females  
77 grown on impoverished food to produce larger offspring (adult) compared to those grown on  
78 nutritionally rich food. Note that many of the maternal effects discussed above are mediated through  
79 variation in resource provisioning by mothers.  
80  
81 Not surprisingly, most of the reports of environment dependent paternal effect (intergenerational and  
82 transgenerational) come from animals with paternal provisioning through nuptial gift transfer to the  
83 females (Dussourd et al., 1988; Gwynne, 1988; Zeh & Smith, 1995; Smedly & Eisner, 1996; Vahed,  
84 1998). However, it is only recently that studies have started to address if similar paternal effects are  
85 also present in species without paternal provisioning. In one of the first such explicit studies, female  
86 Neriid flies (*Teleostylinus angusticollis*) raised on richer diet were found to produce larger eggs and  
87 offspring that developed faster, while males raised on richer diet sired larger offspring with better  
88 survival rate, especially under resource scarcity (Bonduriansky & Head, 2007; Adler & Bonduriansky,  
89 2013). In a solitary Ascidian, *Styela plecata*, males were found to produce offspring with phenotype  
90 corresponding to the population density experienced by the father (Crean et al., 2013). In fruit flies, *D.*  
91 *melanogaster*, Valtonen et al. (2012) reported that fathers fed on poor quality diet sire larger sons.  
92 Paternal experience of the intensity of competition (assessed by the number of co-inhabitant rival  
93 males) adaptively affected reproductive behaviour of male offspring in *D. melanogaster* (Dasgupta et  
94 al., 2016). Islam et al. (1994) showed paternal social environment to have a significant impact on  
95 offspring behavioural traits. Paternal experience of ambient temperature was also found to affect  
96 offspring fecundity in *D. melanogaster* (Huey et al., 1995). Low temperature was found to affect  
97 offspring phenotype in two other species of Drosophila – *D. simulans* (Watson & Hoffmann, 1995)  
98 and *D. serrata* (Magiafoglou & Hoffmann, 2003). Thus, there is a growing body of evidence showing  
99 environment dependent paternal effect. In addition to affecting viability, such paternal effect has been  
100 shown to affect progeny reproductive performance and hence is likely to be key player in sexual  
101 selection (for example, see Bonduriansky & Head, 2007). However, such data are far from being  
102 plenty.

103

104 Here we investigated the effect of paternal experience of population density on progeny fitness  
105 components, including male mating behaviour in *D. melanogaster* laboratory adapted populations. As  
106 discussed previously, paternal effect has already been reported in these (Dasgupta et al., 2016) and  
107 other populations of *D. melanogaster*, establishing them as a relevant system to investigate the  
108 paternal effect and its consequences on Darwinian fitness (William et al., 2006). Further, laboratory  
109 adapted populations of *D. melanogaster* have been used to investigate the fitness consequence of a  
110 plethora of environmental parameters, including population density. Fruit flies naturally grow in  
111 ephemeral resource patches, such as rotting fruits and vegetables. Crowding in transiently available  
112 rich patches is expected to be a key component of their natural ecology. Density of adults in a  
113 resource patch not only determines the extent to which individuals must compete for food and limited  
114 space (e.g., oviposition substrate) but also for other resources, such as suitable mates. Increase in  
115 density also leads to an increase in the probability of disease transmission (Barnes & Siva, 2000). In  
116 essence, density often determines the nature and intensity of selection acting on a population and has  
117 been studied within the broader premises of density dependent selection (MacArthur & Wilson, 1967;  
118 Mueller, 1997; Prasad & Joshi, 2003). Much of the existing literature investigated adaptation to  
119 increased (but stable) juvenile or adult density using experimental evolution on laboratory populations  
120 of *D. melanogaster* (Mueller & Sweet, 1986; Mueller et al., 1991; Nagarajan et al., 2016; Sarangi et  
121 al., 2016; Shenoj et al., 2016; Shenoj & Prasad, 2016). However, little is known about adaptation to  
122 fluctuating density. Intergenerational and transgenerational effects, if used by the parents to optimize  
123 offspring phenotype, can be of adaptive value if density fluctuation across generation is, at least to  
124 some extent, predictable. Interestingly, these experimental evolution studies reported ‘rapid’  
125 adaptation to ‘crowding’. Though evidences unequivocally showed the genetic changes associated  
126 with such adaptation, non-genetic parental effects (trans and intergenerational) may, in addition,  
127 account for the ‘rapid’ adaptation (Bonduriansky and Day 2009). However, this idea has not been  
128 tested – an existing lacuna in the literature, which we intend to fill to some extent.

129

130 To investigate the paternally transmitted intergenerational effect of varying density, we subjected  
131 males to three adult density treatments and then allowed them to sire progeny by mating the treated  
132 males to untreated dams. We then assessed the effect of the paternal adult density (hereafter, referred  
133 to as paternal density) treatment on progeny fitness components in juvenile (juvenile competitive  
134 fitness) and adult stages (males: mating ability, mating latency, copulation duration, courtship  
135 frequency, competitive mating success). We found the paternal density treatment to have significant  
136 intergenerational effect on both juvenile and adult fitness components.

137

### 138 **Materials and Methods:**

139 All the experiments were done using a set of laboratory adapted populations of *D. melanogaster* – BL.  
140 Full laboratory history of these populations can be found in (reference blinded). Briefly, these are a  
141 set of five replicate populations (BL<sub>1-5</sub>) maintained on standard Banana-Jaggery-Yeast food, under  
142 14-day discrete generation cycle at 25 °C ambient temperature, 60-80% relative humidity, with  
143 population size ~2800. Larval density is maintained at ~70 per 6-8ml food per vial (25mm×90mm,  
144 diameter×height). Adult density is ~70 per vial for the first couple of days of their adult life and  
145 thereafter ~2800 individuals in a ~6.4 l cage (19cm×14cm×24cm). We also used a genetically marked  
146 population, BL<sub>st</sub> which was derived from BL<sub>1</sub> by introducing an autosomal recessive marker – scarlet  
147 eye, st (Dasgupta et al. 2016) through a series of six backcrosses. BL<sub>st</sub> population is maintained under  
148 a set of conditions identical to the other BL populations.

149

#### 150 Paternal treatment:

151 Sires and dams were generated from a BL population. The design of the protocol followed to generate  
152 the experimental flies is described in Figure 1. To generate the experimental sires and the dams, eggs  
153 were collected from a BL population and cultured under standard density (i.e., 70 per 6-8ml food per  
154 vial). 100 such vials were set up, of which 65 were used to collect the sires (= sire-vials) and the  
155 remaining 35 for dams (dam vials). Dams were collected as virgins and held in single sex vials at a  
156 density of 25 per vial with ad lib food until the day of the sire-dam mating (see below). In the sire-  
157 vials, all the flies were allowed to eclose. These flies were used to set up three adult density

158 treatments – normal (N: 70 individuals per vial), medium (M: 140 individuals per vial) and high (H:  
159 210 individuals per vial). 10 vials were set up for each of the treatments, using flies that were  
160 approximately 1-day old. These vials were left undisturbed for two days, following which males from  
161 them were separated and used as sires in the subsequent step. Here and elsewhere throughout the  
162 study, all the fly sorting, including collection of virgins, were done under light CO<sub>2</sub>-anaesthesia,  
163 unless mentioned otherwise.

164

165 Sire-dam mating:

166 Following the 2-day long conditioning, 25 males were randomly isolated from each adult density  
167 treatment vials, to be used as sires. They were then combined with dams (see previous section) in  
168 fresh food vials (25 sires + 25 dams in a vial) and allowed to interact for 90 minutes, which is  
169 sufficient time for a single round of mating. This method of ensuring single round of mating has been  
170 previously used (Nandy et al., 2012). In addition, mating was visually observed. Occasionally, in  
171 some vials, a small number of females failed to mate within this time. We did not make any attempt to  
172 remove them. These un-mated females either mated with an already mated male after a while (late  
173 mating) or remained un-mated. Most males secured a single mating, while some very small number  
174 (those which mated with the un-mated females mentioned earlier) may have secured more. The  
175 number of such late-matings (and hence, male re-mating) was very small, and therefore very unlikely  
176 to have any perceivable impact on the subsequent assays. Further, the females in this system usually  
177 do not re-mate within such short span (i.e., 90 minutes) unless the first one was a failed mating, which  
178 is very rare in our populations. Therefore, by following this protocol, we generated singly inseminated  
179 females (average number per vial ~ 25). 10 mating vials were set up per density treatment. After  
180 mating, the sires were discarded and the already inseminated dams from all 10 vials of a treatment  
181 (i.e., a total of 250 females) were transferred to a 2 litre plastic cage with food smeared with ad-lib  
182 quantity of live yeast. Three such cages were thus set up – one for each density treatment. After two  
183 days, eggs were collected from these cages to set up the remainder of the experiments. To collect the  
184 eggs, a fresh food plate was introduced in the cage. The dams were allowed a short window (2-3

185 hours) for oviposition. Using a fine brush, eggs were counted on to a fine Agar-strip, which was then  
186 transferred to the culture vials (see below). These eggs are hereafter referred to as treatment eggs.

187

#### 188 Measurement of egg-size:

189 To test if the sires influenced the size of the eggs laid by the dams (Pischedda et al., 2010), a subset of  
190 these eggs were frozen at -20 °C and their size was measured. For this purpose, eggs were mounted  
191 on a glass slide on their dorsal side and photographed using Nikon Stereozoom trinocular microscope  
192 (SMZ745T) and the area of the two-dimensional elliptical outline of the eggs were measured in  
193 ImageJ, software. This area was taken as a proxy for the size of each egg. A given egg was measured  
194 thrice and the average of these three measurements was taken as the unit of analysis. 50 eggs per  
195 treatment were measured for this purpose.

196

#### 197 Experiment 1: Juvenile fitness assay

198 Egg to adult survivorship was taken as a measure of Juvenile fitness. Survivorship of the treatment  
199 eggs were measured against a back ground of a common competitor (BL<sub>st</sub>) under two conditions –  
200 crowded (C: 150 larvae per 1.5ml food in each vial) and un-crowded (UC: 70 larvae per 6ml food in  
201 each vial). During the assay, treatment eggs generated in the previous step were cultured with eggs  
202 from common competitors in the ratio 1:4 (C: 30 targets, 120 competitors; UC: 14 targets, 56  
203 competitors). These common competitors were collected from an untreated BL<sub>st</sub> stock. On completion  
204 of development, it was possible to identify the target progeny from the competitor progeny based on  
205 eye colour – progeny of the competitors was scarlet eyed whereas the target progeny was red eyed. 10  
206 juvenile competition vials were set up for each of the three treatments (viz., N, M and H) and two  
207 assay conditions (i.e., 10 as C and 10 as UC for each treatment). These vials were left undisturbed  
208 until adult emergence was complete (12<sup>th</sup> day post-egg deposition). The adults were sorted based on  
209 eye colour and counted. Juvenile fitness score ( $w$ ) was calculated for each vial following the formula:

$$210 \quad w = \frac{\text{number of red eyed progeny observed}}{\text{number of red eyed progeny expected}}$$

211 The number of red eyed progeny expected was 14 and 30 for UC and C assay conditions respectively.



212

213 Experiment 2: Assay for behaviour and fitness of the sons

214 To investigate the effect of the treatment on the male progeny, the treatment eggs were cultured in  
215 food vials in the usual density (i.e., 70 per 6 ml food in each vial) and the progeny were allowed to  
216 develop. Upon onset of eclosion, males were collected as virgins (< 6 hours post-eclosion). Four  
217 assays were run with these males. (a) For each treatment, 50 males were immediately frozen at -20 °C  
218 and were later dried at 60 °C for 48 hours and weighed in groups of five using Shimadzu A UW220D  
219 to the nearest 0.01mg. (b) A separate set of males were similarly collected and held in groups of 5 per  
220 vial for further assays. Ten such vials, for each treatment, were set up and left undisturbed till they  
221 were 3days old. These males were then transferred to fresh food vials (hereafter referred to as mating  
222 vials) along with five age-matched, virgin females. Mating vials were set up without the use of  
223 anaesthesia. The females used in this step came from the same replicate BL population and were  
224 generated under their standard maintenance conditions, collected as virgins and held in groups of five  
225 per vial with ample food until the day of the experiment. 10 mating vials were set up for each of the  
226 three treatments. They were observed (manually, without any video recording) continuously till all the  
227 flies finished mating. Every two minutes starting from the time when the females were introduced in  
228 these vials, the total number of mating pairs ( $n_x$ , n: number, x: time elapsed in minutes) was noted  
229 down at each time point ( $x = 0, 2, 4, 6 \dots$ ). Mean mating latency (ML, time taken by a virgin pair to  
230 start mating) and mean copulation duration (CD, duration for which a pair mated) were calculated  
231 following an algorithm mentioned below.

232 
$$ML = \frac{\sum(n_x - n_{x-2})x}{N}$$

233 For all values of x, until,  $n_{x-2} \leq n_x$ .

234 
$$CD = \frac{\sum(n_{x-2} - n_x)x}{N} - ML$$

235 For all values of x, until,  $n_{x-2} \geq n_x$ .

236 Occasionally, some females did not mate within one-hour long observation. These flies were excluded  
237 from the analysis. Similarly, some males also failed to secure mating. In vials having such an  
238 unsuccessful male, a mating was recorded much later – when one of the successful males finished its

239 first mating and then initiated a second one with the un-copulated female. Such late copulations were  
240 also excluded from the analysis. Mating ability (MA) is measured as the proportion of the sons  
241 successfully copulated. MA was calculated for every single vial.

242

243 (c) Courtship frequency was quantified for the 3day old (post-eclosion) sons of the three paternal  
244 density treatments by setting up similar mating vials as described in the previous section. Ten vials  
245 were set up for each treatment. Therefore, a total of 30 vials were observed. After allowing the first  
246 mating, the courtship observation was initiated after a gap of approximately half an hour. Vials where  
247 all the flies did not mate were removed from the assay. Every 45 minutes, each vial was observed for  
248 30 seconds, during which the total number of courtship bouts (male to female) was noted down. A  
249 total of 8 observations were taken. In *Drosophila*, courtship behaviour includes chasing, tapping,  
250 courtship dance and song, genital licking and attempted mounting (Bastock & Manning, 1955;  
251 Sokolowski, 2010). Any of the above mentioned courtship behaviours, displayed by the five males in  
252 each vial was counted as one. The total number of independent male to female courtship displays was  
253 counted within the observation window (Nandy et al., 2013). The treatment identities were unknown  
254 to the observers to avoid observer bias. (d) Another set of males were similarly collected and held, to  
255 be used for quantifying their mating success under competitive condition (CMS, Competitive mating  
256 success). This was done by setting up mating vials with five 3day old target males, five competitor  
257 males (BL<sub>st</sub>) and five virgin females (BL<sub>st</sub>). Ten such mating vials were set up for each of the three  
258 treatments. After allowing a single round of mating for all the females in a mating vial, the females  
259 were individually transferred to oviposition test tubes (12mm diameter × 75mm height) with ample  
260 food. The females were allowed to oviposit for 18 hours. Following oviposition, the females were  
261 discarded and the tubes were retained to allow the progeny to develop and eclose. For each female,  
262 the identity of their mate (whether target/competitor) was ascertained by observing the eye colour of  
263 the progeny. Progeny sired by target males were red eyed whereas those sired by competitors were  
264 scarlet eyed. For a given vial, average CMS of the five target males in the vial was calculated as the  
265 proportion of the females mated to target males (i.e., produced red eyed offspring).

266

267 Experimental replications and data analyses:

268 The entire study was carried out in three randomized blocks, using three different BL populations -  
269 BL<sub>1</sub>, BL<sub>3</sub> and BL<sub>5</sub>. The blocks were handled on separate days. Number of replications within each  
270 block has been mentioned in the previous sections along with the assay design. Except for the egg size  
271 and dry body weight assay, all the experimental replication was done at the level of assay mating vials  
272 or juvenile competition vials. All the assays had 10 replicate vials. Vial means were used as the unit  
273 of analysis. For egg size assay, size of each egg was used as the unit of analysis. For dry body weight,  
274 weight of groups of 5 individuals was used as the unit of analysis. Data were analysed using mixed  
275 model Analysis of Variance (ANOVA). Block was treated as random factor, while paternal density  
276 treatment and assay density (wherever applicable) were treated as fixed factors. Multiple comparisons  
277 were done using Tukey's HSD. All the analyses were done in Statistica, version 10 (Statsoft, Tulsa,  
278 OK, U.S.A.).

279

280 **Results:**

281 Variation in size of the eggs represents variation in maternal provisioning. The effect of the paternal  
282 density treatment on size of the eggs produced by the dams was not significant (Table 1, mean  $\pm$ SE,  
283  $\mu\text{m}^2$ , N: 80039.1  $\pm$ 387.5; M: 79967.4  $\pm$ 415.3; H: 79611.9  $\pm$ 411.4). The juvenile competitive fitness  
284 assay quantified overall egg to adult survival of the target juveniles compared to the same of juveniles  
285 from a common background (common competitors). While the data from un-crowded assay condition  
286 reflects the baseline survivorship, those from crowded assay condition represents difference in juvenile  
287 competitive ability across the three paternal density treatments. Paternal density treatment had a  
288 significant effect on Juvenile fitness (Table 1). While there was no significant difference between N  
289 and M-treatments, H-treatment had 8.9% higher juvenile fitness compared to that of the N-treatment.  
290 This relative advantage of the H-treatment was only evident under larval crowding, i.e., C-assay density  
291 (Figure 2), indicating competitive superiority of the H-juveniles. However, the paternal treatment  $\times$   
292 assay density interaction was marginally non-significant (Table 1).

293 We only quantified the effect of the paternal density on male offspring. We found a significant effect  
294 of the treatment on dry body weight, ML and CMS (Table 1, Figure 3). Multiple comparisons using  
295 Tukey's HSD indicated that dry body weight of the M-sons were significantly less than that of the N-  
296 sons, with M-sons having 8.7% lower mean dry body weight. The difference between the dry body  
297 weight of the H and N-sons was not statistically significant. Hence the M-sons were significantly  
298 smaller compared to the other two treatments. In the mating assay, though we found some males to fail  
299 in acquiring mating, there was no effect of the treatment on mating ability of the sons (MA: mean  $\pm$ SE,  
300 N:  $0.91 \pm 0.04$ ; M:  $0.91 \pm 0.04$ ; H:  $0.93 \pm 0.04$ ). The M-treatment sons showed significantly higher  
301 (approximately 35%) ML compared to that showed by the N-treatment sons. While H-treatment also  
302 showed 16% higher ML compared to N-treatment, this difference was not significant. Therefore, M-  
303 sons took longer to start mating with virgin females indicating females' reluctance to accept them as  
304 mate due to either poor performance in courtship or small size. This relative disadvantage of the M-  
305 sons was also evident in terms of their competitive ability in mating competitions. Multiple comparisons  
306 on the CMS results indicated that the M-sons had significantly lower CMS compared to H and N-  
307 treatments. CMS of the M-sons was approximately 34% less than that of the N-sons. This is however,  
308 not due to a reduced courtship performance by the M-sons as we found the effect of the treatment on  
309 CF (mean  $\pm$ SE, N:  $6.7 \pm 0.6$ ; M:  $6.8 \pm 0.6$ ; H:  $7.6 \pm 0.8$ ) to be non-significant. We also did not find any  
310 effect of the treatment on CD (mean  $\pm$ SE, minutes, N:  $18.6 \pm 0.4$ ; M:  $17.6 \pm 0.4$ ; H:  $17.9 \pm 0.4$ ), potentially  
311 indicating the lack of the treatment effect on post-copulatory traits of the sons (Table 1).

312

### 313 **Discussion:**

314 Given that very few studies have shown the effect of paternal environment on offspring fitness  
315 components, there were two main objectives of the present study – (a) to assess if paternal exposure to  
316 varying population density affected progeny traits; if yes, then (b) to evaluate the adaptive  
317 significance of such effect. The results clearly showed that at sufficiently high density, males had an  
318 adaptive paternal effect on juvenile competitive fitness. As we did not find any effect of our treatment  
319 on size of the eggs produced by the dams, such paternal effect is unlikely to be mediated by variation

320 in provisioning by the females. We further show that at intermediate density, males sire smaller sons  
321 which are inferior in acquiring mates. Interestingly, such maladaptive effect of paternal density on  
322 offspring adult fitness was not detected at high density.  
323  
324 In holometabolous insects like fruit flies, juvenile (larva and pupa) survival constitutes one of the  
325 most important components of fitness (Prasad & Joshi, 2003). In addition, juvenile ecology may also  
326 have a major effect on the life-history and fitness components of the adult stage (Heat shock: Khazaeli  
327 et al. 1997; cold shock: Singh et al., 2015; Singh & Prasad, 2016; crowding: Joshi & Mueller, 1988;  
328 Sarangi et al., 2016; Shenoj et al., 2016). The observed paternal effect on juvenile competitive fitness  
329 therefore is extremely consequential. Some relatively recent studies have pointed out that evolving  
330 parental ability to optimize offspring fitness related traits can be an adaptation to ecological  
331 challenges (Galloway & Etterson, 2007), including crowding (Crean et al., 2013). Given that fruit fly  
332 natural ecology regularly involves adult and larval crowding, the observed paternal effect on juvenile  
333 competitive fitness can indicate males' adaptation to crowding. Interestingly, we observed the  
334 paternal effect on juvenile competitive fitness, only at the highest density, which may indicate a  
335 certain threshold density beyond which such paternal effect starts affecting offspring traits. In  
336 addition, when assayed under un-crowded condition the progeny from the three sire treatments do not  
337 show any measurable difference in their egg-to-adult survival. This suggests that the juvenile  
338 competitive ability rather than baseline juvenile viability was affected by the treatment. Since a  
339 number of traits (e.g., feeding rate, waste tolerance, development time etc.) affect juvenile competitive  
340 ability in these flies, it will be interesting to find out the trait responsible for better competitive ability  
341 of the H-sons in our study.  
342  
343 In a wide range of species including *Drosophila melanogaster*, maternal exposure to high density or  
344 poor nutrition has been found to affect offspring fitness components (Prasad & Joshi, 2003;  
345 Vijendravarma, 2010; Valtonen, 2012). Such effects can either be beneficial (Mitchell & Read, 2005;  
346 Bashey, 2006; Allen et al., 2008; Vijendravarma, 2010; Gorbi et al., 2011) or detrimental (Meylan et  
347 al., 2007) depending on the component of the fitness under consideration and the prevailing condition.

348 As maternal provisioning and other maternal effects play vital roles in offspring survival and  
349 performance, such maternal density/nutrition effect is not surprising. However, what is not intuitive is  
350 the paternal density to have similar impact on offspring fitness, as our results suggest, given that  
351 *Drosophila* males do not pass on any nutrition to the offspring. It is well known in the *Drosophila*  
352 literature that even the laboratory populations harbour heritable genetic variation in survival under  
353 crowding both as adults and juveniles (see Sarangi et al., 2016 and the references therein for an  
354 updated review). Therefore, one possibility is that genetically superior males, which are better at  
355 surviving under high density, may produce offspring which are better both as juveniles, explaining at  
356 least part of our observations. Though larval competitive ability is known to respond to experimental  
357 evolution, indicating heritable genetic variation (Mueller, 1997; Prasad & Joshi, 2003), such heritable  
358 variation is very unlikely to have led to the observed treatment effect on juvenile competitive fitness.  
359 This is because (a) in our assay, we recorded very little mortality in males during the treatment,  
360 indicating negligible hard selection. In addition, we also ensured that there was no soft selection by  
361 randomly picking the set of males from the treatment vials to use them as sires. Further, we allowed  
362 the sires and the dams to mate only once by allowing them a limited window of time to interact after  
363 being put together in mating vials. (b) Even if there was selection in the current experimental design,  
364 the selection is likely to be weak (see Materials & Methods section). Such weak selection is unlikely  
365 to explain the observed differences in some of the traits (viz., 8.9% increase in juvenile competitive  
366 fitness, 35% increase in mating latency), especially within one generation. Alternatively, males may  
367 alter maternal provisioning and thereby indirectly affect offspring fitness components (Prasad et al.,  
368 2003; Vijendravarma et al., 2010). We, however, did not find any measurable difference in the size of  
369 the eggs produced by females mated to the males belonging to the three treatments, making variation  
370 in maternal provisioning an unlikely explanation. Therefore, although sire-effect on the quality of the  
371 eggs produced by the females cannot be completely ruled out, our results tentatively point at non-  
372 genetic paternal effect (Bonduriansky & Day, 2009) as the potential cause behind the observed effect  
373 of the treatment. Interestingly, a recent study on *D. melanogaster* has shown paternal effects to have  
374 important consequences on the expression of an array of genes in sons (Zajitschek et al., 2017, also  
375 see the corresponding correction). In addition, Garcia-Gonzalez & Dowling (2015) reported non-sire

376 effect on daughters' reproductive output in *D. melanogaster*, possibly caused by the seminal fluid  
377 proteins transferred by the males to their mates during copulation (Garcia-Gonzalez & Dowling,  
378 2015).

379

380 While we found adaptive paternal effect on juvenile performance, adult performance however, was  
381 found to have a significant maladaptive effect of paternal density. Males that experienced  
382 intermediate density were found to sire sons which (a) are smaller, (b) take longer time to start mating  
383 and (c) have lower mating success. Since we did not find any effect of the treatment on courtship  
384 frequency, reduced mating success and increased mating latency was a likely outcome of females'  
385 reluctance to accept relatively smaller males as their mates, a known fitness consequence of reduced  
386 size in *Drosophila* males (Partridge et al., 1987; Jagadeeshan et al., 2015). Body size has been  
387 reported to be affected by intergenerational paternal effect in another Dipteran – *Telostylinus*  
388 *angusticollis* (Bonduriansky & Head, 2007). Unlike the maladaptive effect found in our study, the  
389 paternal effect on body size reported by Bonduriansky & Head (2007), however, was adaptive,  
390 especially under certain prevailing conditions. Though *prima facie*, the observed body size reduction  
391 appears to be maladaptive, it will be interesting to investigate its fitness consequence under varying  
392 adult density. Interestingly, this effect was found only at intermediate density and not in the high  
393 density treatment. At this point, it is, however, difficult to suggest any reason for such specific  
394 expression of the paternal effect at intermediate density.

395

396 As variation in population density and crowding related ecological challenges are common in almost  
397 all organisms, including fruit flies, paternal effect of the nature reported here is important to  
398 understand. Though paternal ability to optimize offspring traits is likely to be adaptive, especially  
399 under fluctuating environment, the results reported here show that paternal effect can be both adaptive  
400 and maladaptive. To the best of our knowledge this is the first evidence of the effect of paternal  
401 density on juvenile and adult fitness components in *D. melanogaster*. Importantly, our results  
402 emphasize the importance of considering paternal effect as a source of variation in fitness related  
403 traits. The full impact of such paternal effect in the evolution of life-history traits and the underlying

404 mechanisms are emerging as an important topic of discussion, which is likely to see an increasing  
405 attention in years to come.

406

407 **Acknowledgements:**

408 We are immensely thankful to N. G. Prasad (IISER Mohali) for sharing the fly populations, using  
409 which the BL populations were created and also for his critical comments on a previous version of  
410 this manuscript. We are also thankful to Syed Zeeshan Ali and Vanika Gupta for their critical  
411 comments on a previous version of the manuscript. TV and PD thank Indian Institute of Science  
412 Education and Research Berhampur for financial assistance in the form of the Institute Scholarship for  
413 Ph.D. programme. The study was supported by a research grant from Department of Science and  
414 Technology (INSPIRE Faculty award, Grant no. DST/INSPIRE/04/2013/000520).

415

416 **Authors' contributions:**

417 BN, PD and SS conceived the ideas and designed the assays. PD, SS, AAD, TV, and to a lesser extent  
418 BN performed the assays and collected the data. Data analysis was primarily done by BN and to some  
419 extent, by PD. While BN and PD led the writing of the manuscript, SS and TV provided important  
420 assistance and inputs.

421

422 **Conflict of interest:** The authors declare no conflict of interest.

423 **Data intended to be archived in:** Dryad

424

425

426 **References:**

427 Adler, M.I. & Bonduriansky, R. 2013. Paternal Effects on Offspring Fitness Reflect Father's Social  
428 Environment. *Evol. Biol.* **40**: 288-292.

429 Allen, R.M., Buckley, Y.M. & Marshall, D.J. 2008. Offspring Size Plasticity in Response to  
430 Intraspecific Competition: An Adaptive Maternal Effect across Life-History Stages. *Am. Nat.*  
431 **171**: 225-237.



- 432 Barnes, A.I. & Siva, M.T. 2000. Density-dependent prophylaxis in the mealworm beetle *Tenebrio*  
433 *molitor* L. (Coleoptera: Tenebrionidae): cuticular melanization is an indicator of investment in  
434 immunity. *Proc. R. Soc. Lond. B* **267**: 177-182.
- 435 Bashey, F. 2006. Cross-generational environmental effects and the evolution of offspring size in the  
436 Trinidadian Guppy *Poecilia reticulata*. *Evolution* **60**: 348-361.
- 437 Bastock, M. & Manning, A. 1955 The Courtship of *Drosophila melanogaster*. *Behaviour* **8**: 85-111.
- 438 Bonduriansky, R. & Day, T. 2009. Nongenetic inheritance and its evolutionary implications. *Annu.*  
439 *Rev. Ecol. Evol. Syst.* **40**: 103–125.
- 440 Bonduriansky, R. & Head, M. 2007. Maternal and paternal condition effects on offspring phenotype  
441 in *Telostylinus angusticollis* (Diptera: Neriidae). *Int. J. Evol. Biol.* **20**: 2379-2388.
- 442 Christian, J.J. & Lemunyan, C.D. 1958. Adverse effects of crowding on lactation and reproduction of  
443 mice and two generations of their progeny. *Endocrinology* **63**: 517-529.
- 444 Crean, A.J., Dwyer, J.M. & Marshall, D.J. 2013. Adaptive paternal effects? Experimental evidence  
445 that the paternal environment affects offspring performance. *Ecology* **94**: 2575-2582.
- 446 Dasgupta, P., Halder, S. & B. Nandy. 2016. Paternal social experience affects male reproductive  
447 behaviour in *Drosophila melanogaster*. *J. Genet.* **95**: 725-727.
- 448 Dias, B.G. & Ressler, K.J., 2014. Experimental evidence needed to demonstrate inter-and trans-  
449 generational effects of ancestral experiences in mammals. *Bioessays* **36**: 919-923.
- 450 Dussourd, D.E., Ubik, K., Harvis, C., Resch, J., Meinwald, J. & Eisner, T. 1988. Biparental defensive  
451 endowment of eggs with acquired plant alkaloid in the moth *Utetheisa ornatrix*. *Proc. Natl.*  
452 *Acad. Sci. U.S.A.* **85**: 5992-5996.
- 453 Friberg, U., Stewart, A.D. & Rice, W.R. 2012. X- and Y-chromosome linked paternal effects on a  
454 life-history trait. *Biol. Lett.* **8**: 71-73.
- 455 Galloway, L.F. & Etterson, J.R. 2007. Transgenerational plasticity is adaptive in the wild. *Science*  
456 **318**: 1134-1136.
- 457 Garcia-Gonzalez F., & Dowling D.K. 2015 Transgenerational effects of sexual interactions and sexual  
458 conflict: non-sires boost the fecundity of females in the following generation. *Biol. Lett.* **11**:  
459 20150067.

- 460 Gorbi, G., Moroni, F., Sei, S., & Rossi, V. 2011. Anticipatory maternal effects in two different clones  
461 of *Daphnia magna* in response to food shortage. *J. Limnol.* **70**: 222-230.
- 462 Gwynne, D.T. 1988 Courtship feeding in katydids benefits the mating male's offspring. *Behav. Ecol.*  
463 *Sociobiol.* **23**: 373-377.
- 464 Holbrook, G.L. & Schal, C. 2004. Maternal investment affects offspring phenotypic plasticity in a  
465 viviparous cockroach. *Proc. Natl. Acad. Sci. U S A.* **101**: 5595-5597.
- 466 Huey, R.B., Wakefield, T., Crill, W.D., & Gilchrist, G. 1995. Within- and between-generation effects  
467 of temperature on early fecundity of *Drosophila melanogaster*. *Heredity* **74**: 216-223.
- 468 Islam, M.S., Roessingh, P., Simpson, S.J. & McCaffery, A.R. 1994. Parental effects on the behaviour  
469 and colouration of nymphs of the desert locust *Schistocerca gregaria*. *J. Insect Physiol.* **40**: 173-  
470 181.
- 471 Jagadeeshan, S., Shah, U., Chakrabarti, D. & Singh, R.S. 2015. Female Choice or Male Sex Drive?  
472 The Advantages of Male Body Size during Mating in *Drosophila Melanogaster*. *PLoS ONE* **10**:  
473 e0144672
- 474 Joshi, A. & Mueller, L.D. 1988 Evolution of higher feeding rate in *Drosophila* due to density-  
475 dependent natural selection. *Evolution*, **42**: 1090-1093.
- 476 Khazaeli, A.A., Tatar, M., Pletcher, S.D. & Curtsinger, J.W. 1997. Heat-induced longevity extension  
477 in *Drosophila*. I. Heat treatment, mortality, and thermotolerance. *J. Gerontol.* **52a**: B48-B52.
- 478 Kuijper, B. & Hoyle, R.B. 2015. When to rely on maternal effects and when on phenotypic plasticity?  
479 *Evolution* **69**: 950-968.
- 480 MacArthur, R.H. & Wilson, E.O. 1967. *The theory of island biogeography*. Princeton Univ. Press,  
481 Princeton, NJ.
- 482 Magiafoglou, A. & Hoffmann, A.A. 2003. Cross-generation effects due to cold exposure in  
483 *Drosophila serrata*. *Funct. Ecol.* **17**: 664-672.
- 484 Mousseau, T. A., & C. W. Fox. 1998. Maternal effects as adaptations. Oxford University Press,  
485 Oxford, UK.
- 486 Meylan, S., Clobert, J. & Sinervo, B. 2007. Adaptive significance of maternal induction of density-  
487 dependent phenotypes. *Oikos* **116**: 650-661.

- 488 Mitchell, S.E. & Read, A.F. 2005. Poor maternal environment enhances offspring disease resistance  
489 in an invertebrate. *Proc. Biol. Sci.* **272**: 2601–2607.
- 490 Mousseau, T.A. & Fox, C.W. 1998. The adaptive significance of maternal effects. *Trends in Ecology*  
491 *and Evolution* **13**: 403-407.
- 492 Mueller, L.D. 1997. Theoretical and Empirical Examination of Density-Dependent Selection. *Annu.*  
493 *Rev. Ecol. Syst.* **28**: 269-288.
- 494 Mueller, L.D., Guo, P.Z. & Ayala FJ. 1991. Density-dependent natural selection produces trade-offs  
495 in life history traits. *Science* **253**: 433-435.
- 496 Mueller, L.D. & Sweet, V.F. 1986. Density-dependent natural selection in *Drosophila*: Evolution of  
497 pupation height. *Evolution* **40**: 1354-1356.
- 498 Nagarajan, A., Natarajan, S.B., Jayaram, M., Joshi, A. 2016. Adaptation to larval crowding in  
499 *Drosophila ananassae* and *Drosophila nasuta nasuta*: increased larval competitive ability  
500 without increased larval feeding rate. *J. Genet.* **95**: 411-425.
- 501 Nandy, B., Gupta, V., Sen, S., Udaykumar, N., Samant, M.A., Ali, S.Z. & Prasad, N.G. 2013.  
502 Evolution of mate-harm, longevity and behaviour in male fruit flies subjected to different levels  
503 of interlocus conflict. *BMC Evol. Biol.* **13**: 212.
- 504 Nandy, B., Joshi, A., Ali, S.Z., Sen, S. & Prasad, N.G. 2012. Degree of adaptive male mate choice is  
505 positively correlated with female quality variance. *Sci. Rep.* **2**: 447.
- 506 Partridge, L., Ewing, A. & Chandler, A. 1987. Male size and mating success in *Drosophila*  
507 *melanogaster*: the roles of male and female behaviour. *Anim. Behav.* **35**: 555-562.
- 508 Pischedda, A., Stewart, A.D., Little, M.K., Rice, W.R. 2010. Male genotype influences female  
509 reproductive investment in *Drosophila melanogaster*. *Proc. R. Soc. B* **278**: 2165–2172.
- 510 Prasad, N.G. & Joshi, A. 2003. What have two decades of laboratory life-history evolution studies on  
511 *Drosophila melanogaster* taught us? *J. Genet.* **82**: 45–76.
- 512 Prasad, N.G., Shakarad, M., Rajamani, M. & Joshi, A. 2003. Interaction between the effects of  
513 maternal and larval nutritional levels on pre-adult survival in *Drosophila melanogaster*. *Evol.*  
514 *Ecol. Res.* **5**: 903-911.

- 515 Reznick, D.N. & Reznick, Y.A. 1993. The influence of fluctuating resources on life-history: Patterns  
516 of allocation and plasticity in female Guppies. *Ecology* **74**: 2011-2019.
- 517 Rossiter, M.C. 1996. Incidences and consequences of inherited environmental effects. *Annu. Rev.*  
518 *Ecol. Syst.* **27**: 451-476.
- 519 Sarangi, M., Nagarajan, A., Dey, S., Bose, J. & Joshi, A. 2016. Evolution of increased larval  
520 competitive ability in *Drosophila melanogaster* without increased larval feeding rate. *J. Genet.*  
521 **95**: 491-503.
- 522 Sheno, V.N., Banerjee, S.M., Guruswamy, B., Sen, S., Ali, Z.S., & Prasad, N.G. 2016. *Drosophila*  
523 *melanogaster* males evolve increased courtship as a correlated response to larval  
524 crowding. *Anim. Behav.* **120**: 183 -193.
- 525 Sheno, V.N. & Prasad, N.G. 2016. Local adaptation to developmental density does not lead to higher  
526 mating success in *Drosophila melanogaster*. *Int.J. Evol. Biol.* **29**: 407-417.
- 527 Singh, K., Kochar, E. & Prasad, N.G. 2015. Egg viability, mating frequency and male mating ability  
528 evolve in populations of *Drosophila melanogaster* selected for resistance to cold shock. *PLoS*  
529 *ONE* **10**: e0129992.
- 530 Singh, K. & Prasad, N.G. 2016. Evolution of pre- and post-copulatory traits in female *Drosophila*  
531 *melanogaster* as a correlated response to selection for resistance to cold stress. *J. Insect Physiol.*  
532 **91-92**: 26-33.
- 533 Smedly, S.R. & Eisner, T. 1996. Sodium: A male moth's gift to its offspring. *Proc. Natl. Acad. Sci.*  
534 *U.S.A.* **93**: 809-813.
- 535 Sokolowski, M.B. 2010 Social interactions in "simple" model systems. *Neuron* **65**: 780-794.
- 536 Vahed, K. 1998. The function of nuptial feeding in insects: a review of empirical studies. *Biol. Rev.*  
537 **73**: 43-78.
- 538 Valtonen, T.M., Kangassal, K., Pölkki, M. & Rantala, M.J. 2012. Transgenerational Effects of  
539 Parental Larval Diet on Offspring Development Time, Adult Body Size and Pathogen Resistance  
540 in *Drosophila melanogaster*. *PLoS ONE* **7(2)**: e31611.
- 541 Vijendravarma, R.K., Narasimha, S., Kawecki, T.J. 2010. Effects of parental larval diet on egg size  
542 and offspring traits in *Drosophila*. *Biol. Lett.* **6**: 238-241.

- 543 Watson, M.J.O. & Hoffmann, A.A. 1995. Cross-Generation Effects for Cold Resistance in Tropical  
544 Populations of *Drosophila melanogaster* and *Drosophila simulans*. *Aust. J. Zool.* **43**: 51 – 58.
- 545 William, R.R., Stewart, A.D., Morrow, E.H., Linder, J.E., Orteiza, N. & Byrne, P.G. 2006. Assessing  
546 sexual conflict in the *Drosophila melanogaster* laboratory model system. *Philos. Trans. R. Soc.*  
547 *Lond. B. Biol. Sci.* **361**: 287-299.
- 548 Zeh, D.W. & Smith, R.L. 1995. Paternal investment by terrestrial arthropods. *Am. Zool.* **25**: 785-805.
- 549 Zajitschek, F., Zajitschek, S. & Manier, M., 2017. High-protein paternal diet confers an advantage to  
550 sons in sperm competition. *Biol. lett.* **13**: 20160914.
- 551 Yehuda, R., Bierer, L.M., Schmeidler, J., Aferiat, D.H., Breslau, I. & Dolan, S., 2000. Low cortisol  
552 and risk for PTSD in adult offspring of holocaust survivors. *Am. J. Psychiatry* **157**: 1252-1259.
- 553

554 **Table 1:** Summary of results of mixed model ANOVA on the various traits under investigation.  
 555 Paternal density and assay density (wherever applicable) were considered as fixed factor, while block  
 556 as random factor. All tests were done considering  $\alpha=0.05$  and significant p-values are mentioned in  
 557 **bold** face.  
 558

| Trait                      | Effect                | SS                    | DF | MS                    | DF Den | MS Den                | F      | p                |
|----------------------------|-----------------------|-----------------------|----|-----------------------|--------|-----------------------|--------|------------------|
| Egg size                   | Paternal density (PD) | $1.75 \times 10^7$    | 2  | $8.75 \times 10^6$    | 4.02   | $3.53 \times 10^6$    | 2.48   | 0.20             |
|                            | Block                 | $9.84 \times 10^8$    | 2  | $4.92 \times 10^8$    | 4.03   | $3.54 \times 10^6$    | 139.11 | <b>&lt;0.01</b>  |
|                            | PD×Block              | $1.41 \times 10^7$    | 4  | $3.53 \times 10^6$    | 438.00 | $2.25 \times 10^7$    | 0.16   | 0.96             |
| Juvenile fitness           | Paternal density (PD) | 0.21                  | 2  | 0.11                  | 4.03   | 0.01                  | 9.93   | <b>0.03</b>      |
|                            | Assay density (AD)    | 0.97                  | 1  | 0.97                  | 2.00   | 0.10                  | 9.31   | 0.09             |
|                            | Block                 | 0.40                  | 2  | 0.20                  | 1.58   | 0.09                  | 2.15   | 0.35             |
|                            | PD×AD                 | 0.23                  | 2  | 0.11                  | 4.01   | 0.02                  | 5.42   | 0.07             |
|                            | PD×Block              | 0.04                  | 4  | 0.01                  | 4.00   | 0.02                  | 0.51   | 0.74             |
|                            | AD×Block              | 0.21                  | 2  | 0.10                  | 4.00   | 0.02                  | 4.96   | 0.08             |
|                            | PD × AD × Block       | 0.08                  | 4  | 0.02                  | 148.00 | 0.02                  | 1.24   | 0.30             |
| Dry body weight            | Paternal density (PD) | $2.67 \times 10^{-7}$ | 2  | $1.34 \times 10^{-7}$ | 4.00   | $6.22 \times 10^{-9}$ | 21.49  | <b>&lt; 0.01</b> |
|                            | Block                 | $7.78 \times 10^{-7}$ | 2  | $3.89 \times 10^{-7}$ | 4.00   | $6.22 \times 10^{-9}$ | 62.50  | <b>&lt; 0.01</b> |
|                            | PD×Block              | $2.49 \times 10^{-8}$ | 4  | $6.22 \times 10^{-9}$ | 80     | $1.27 \times 10^{-8}$ | 0.49   | 0.74             |
| Mating latency             | Paternal density (PD) | 41.810                | 2  | 20.90                 | 4      | 1.12                  | 18.59  | <b>0.01</b>      |
|                            | Block                 | 51.158                | 2  | 25.58                 | 4      | 1.12                  | 22.75  | <b>0.01</b>      |
|                            | PD×Block              | 4.477                 | 4  | 1.12                  | 77     | 4.59                  | 0.24   | 0.91             |
| Copulation duration        | Paternal density (PD) | 14.43                 | 2  | 7.21                  | 4      | 1.81                  | 3.98   | 0.11             |
|                            | Block                 | 80.87                 | 2  | 40.44                 | 4      | 1.81                  | 22.32  | <b>0.01</b>      |
|                            | PD×Block              | 7.22                  | 4  | 1.81                  | 77     | 5.51                  | 0.33   | 0.86             |
| Mating ability             | Paternal density (PD) | 0.009259              | 2  | 0.00                  | 4      | 0.04                  | 0.10   | 0.90             |
|                            | Block                 | 0.046678              | 2  | 0.02                  | 4      | 0.04                  | 0.52   | 0.63             |
|                            | PD×Block              | 0.179963              | 4  | 0.04                  | 77     | 0.02                  | 2.64   | <b>0.04</b>      |
| Courtship frequency        | Paternal density (PD) | 13.28                 | 2  | 6.64                  | 4.03   | 10.79                 | 0.62   | 0.58             |
|                            | Block                 | 500.78                | 2  | 250.39                | 4.00   | 10.81                 | 23.16  | <b>0.01</b>      |
|                            | PD×Block              | 43.24                 | 4  | 10.81                 | 73.00  | 7.36                  | 1.47   | 0.22             |
| Competitive mating success | Paternal density (PD) | 0.64                  | 2  | 0.32                  | 4.03   | 0.02                  | 19.47  | <b>0.01</b>      |
|                            | Block                 | 0.09                  | 2  | 0.05                  | 4.06   | 0.02                  | 2.86   | 0.17             |
|                            | PD×Block              | 0.07                  | 4  | 0.02                  | 75.00  | 0.04                  | 0.41   | 0.80             |

559

560

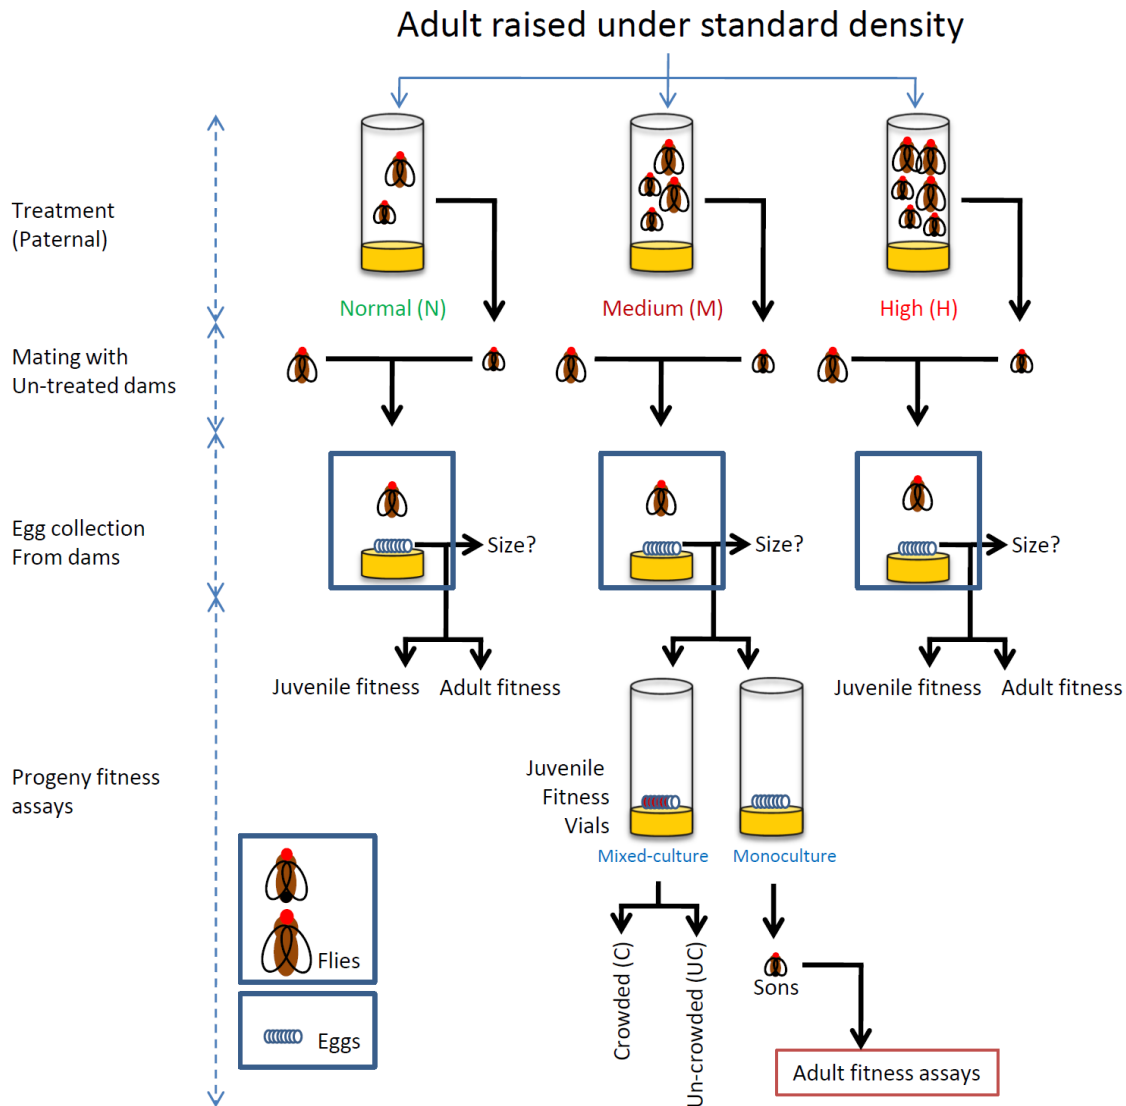

561

562

563 **Figure 1:** The design of the assay. The schematic diagram shows the design of the entire study, which

564 spanned two generations. Treatment [Normal (N), Medium (M) and High (H) adult densities] was

565 given in the paternal generation. Untreated dams were mated to the treated sires, followed by the

566 collection of eggs from the dams. Assays were done with the eggs and the offspring emerging out of

567 the eggs. Some eggs were subjected to mixed culture (along with competitor eggs) and juvenile

568 competitive fitness vials were set up. Some eggs were cultured as monocultures (without any

569 competitor eggs) – male progeny emerging from these vials were used for further assays, such as,

570 mating ability, mating latency, copulation duration, competitive mating success and courtship

571 frequency.

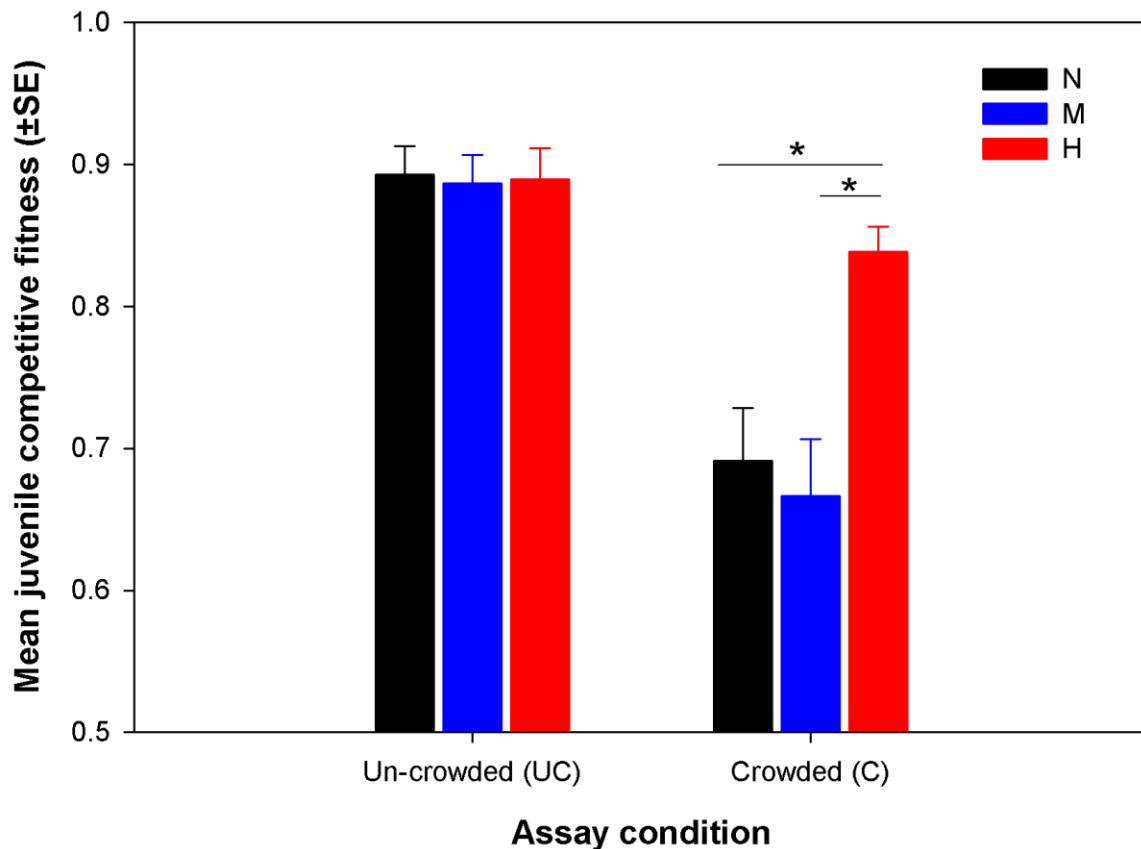

572

573 **Figure 2:** Effect of the paternal density treatment on juvenile competitive fitness, under crowded and

574 un-crowded assay conditions. Target eggs (eggs produced by dams mated to treatment sires) were

575 cultured with competitor eggs (eggs produced by untreated females and males) in juvenile

576 competition vials – under un-crowded and crowded conditions. Proportion of the target progeny

577 successfully emerging as adults is considered as the measure of juvenile competitive fitness. Black,

578 blue and red colour coding represent the progeny of Normal (N), Medium (M) and High (H) density

579 treatment males respectively. The H-progeny were found to have higher juvenile competitive fitness

580 compared to N and M-progeny (represented by \*asterisk), only when assayed under crowded

581 condition. The entire experiment was done following a randomized block design and the data were

582 analysed using three factor mixed model ANOVA with paternal treatment and assay condition as

583 fixed factors and block as random factor.

584

585



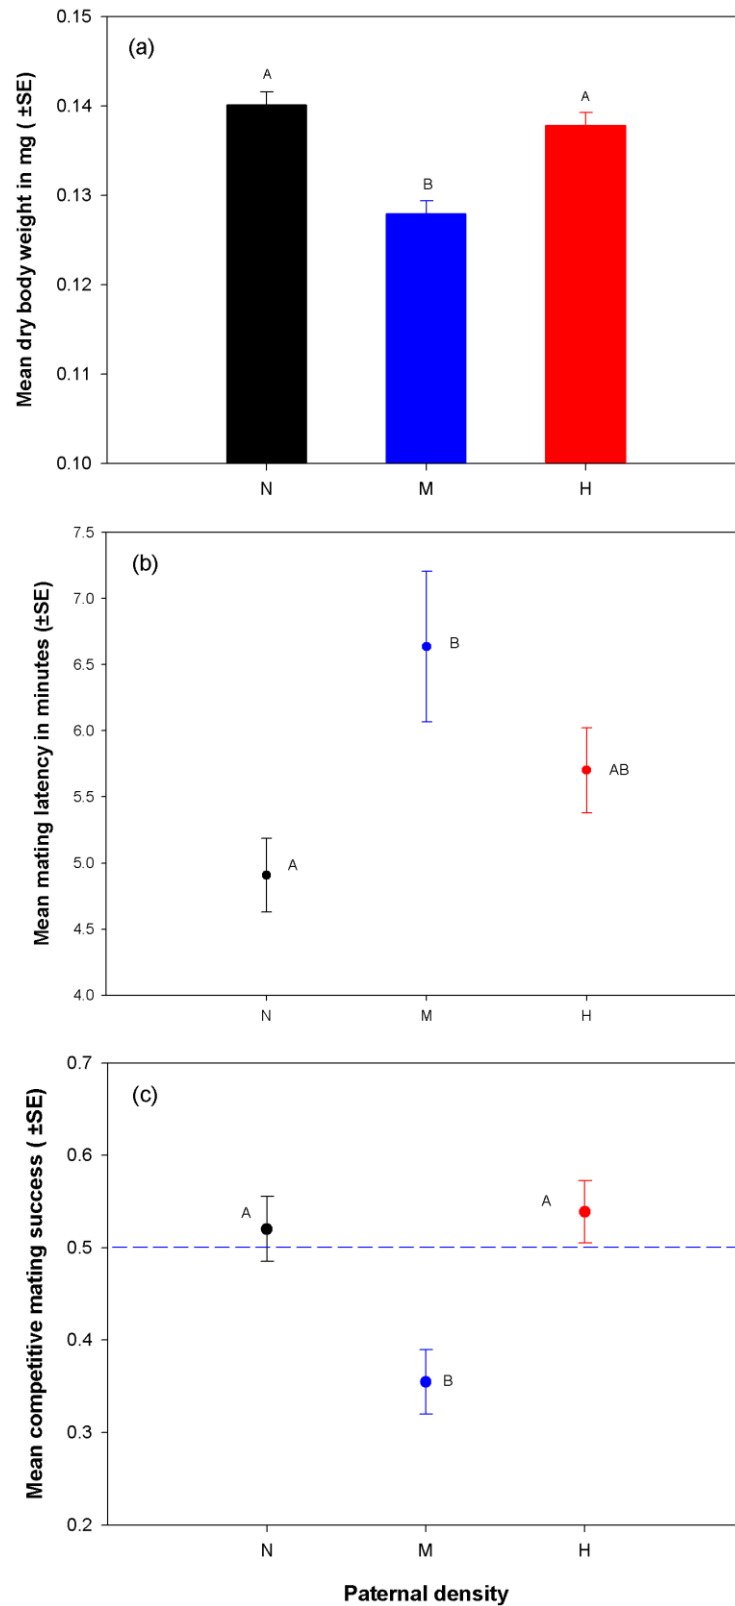

586

587 **Figure 3:** Effect of the paternal density treatment on male offspring. (a) Dry body weight at eclosion:

588 five flies were weighted together to nearest 0.01mg. This was then used as the unit of analysis; (b)

589 Mean mating latency (time taken by a virgin male-female pair to start copulation): mean ML was

590 calculated for five males in a vial following the algorithm given in the Materials & Methods section.  
591 This was done for all the mating vials in the assay. These values were then used as the unit of  
592 analysis; (c) Competitive mating success (CMS): CMS values were calculated for each vial having  
593 five target males as the proportion of females mated to target males in these assay vials. These values  
594 were then used as the unit of analysis. The blue broken line indicates the expected value of CMS if  
595 there is no mating bias. Black, blue and red colour coding represent data from the progeny of N, M  
596 and H males respectively. Treatments not sharing common alphabet were found to be significantly  
597 different from each other. The entire experiment was done following a randomized block design and  
598 the data were analysed using three factor mixed model ANOVA with paternal treatment and assay  
599 condition as fixed factors and block as random factor.

600

601

602

603

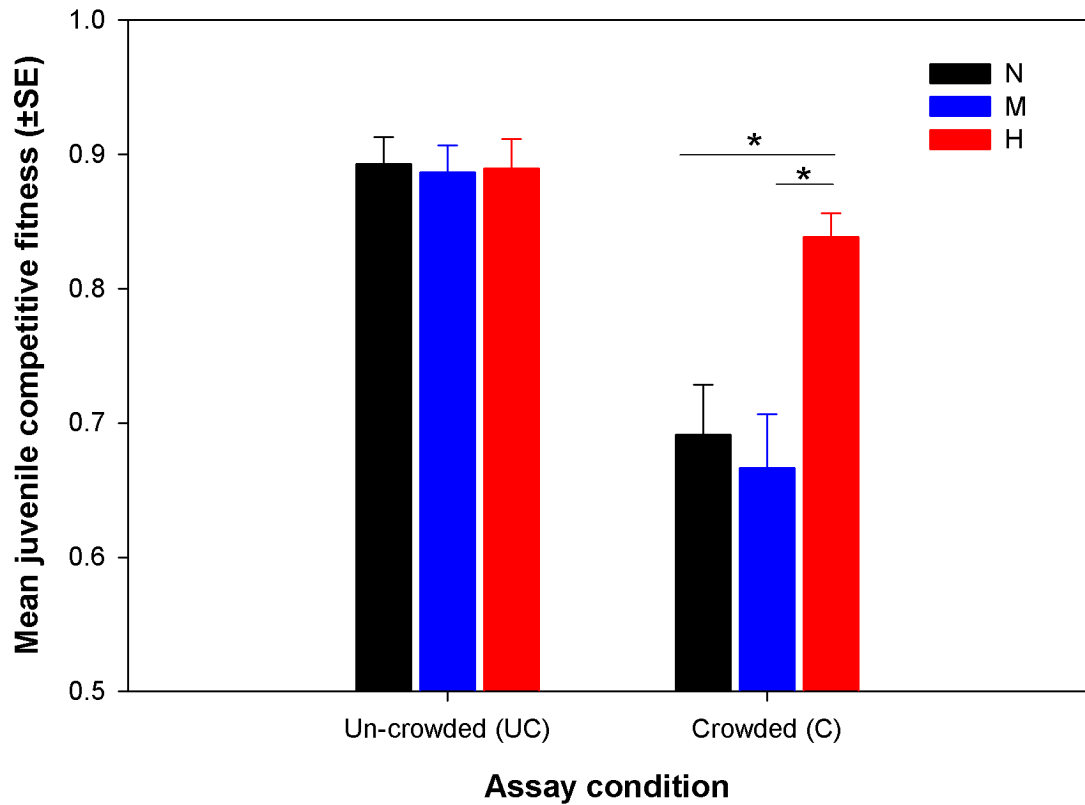

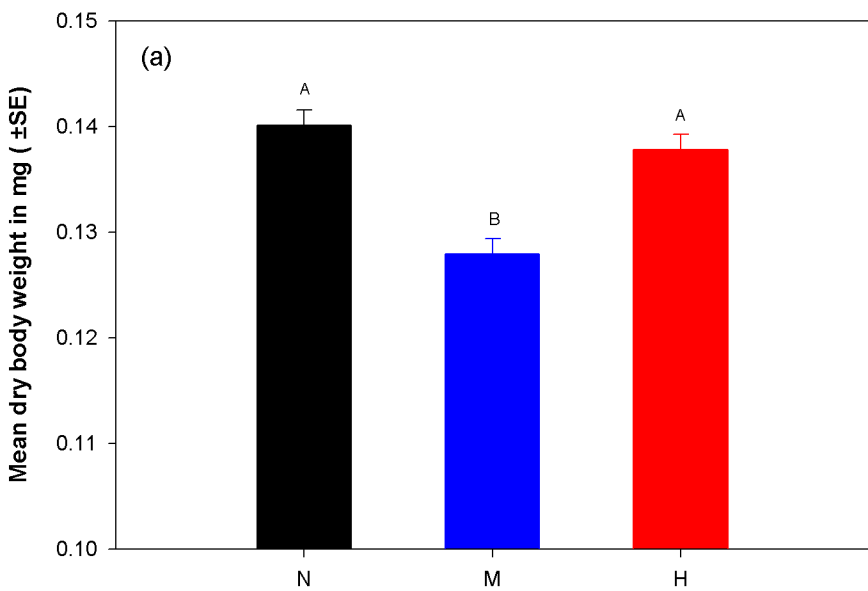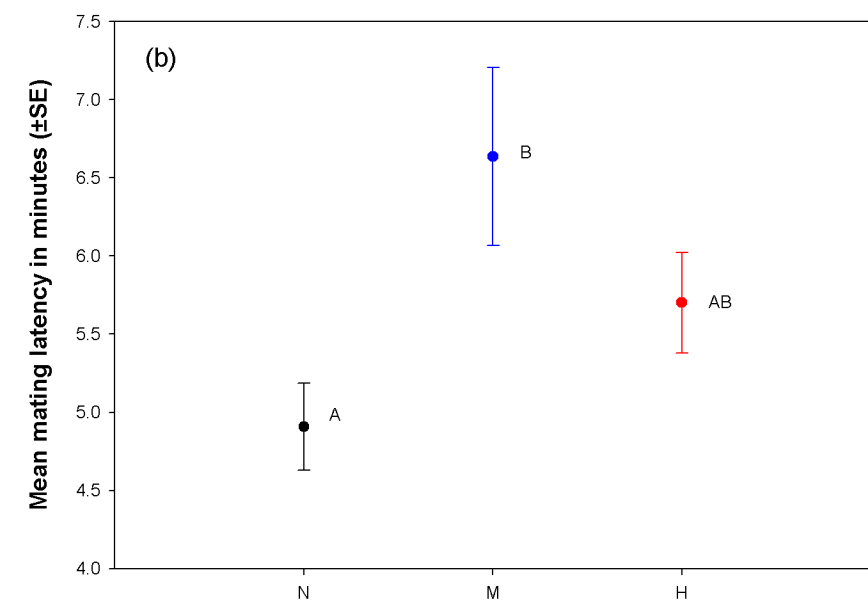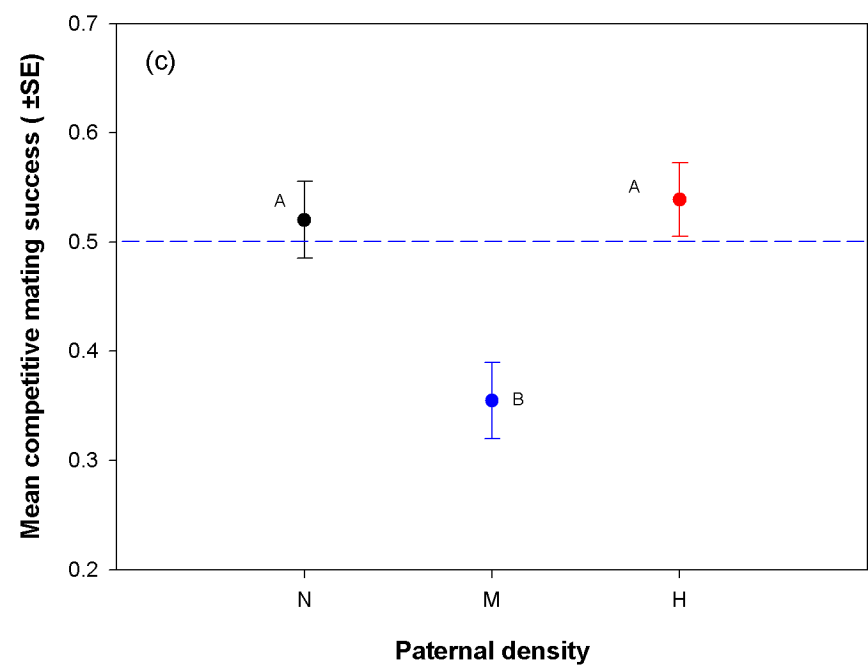

# Adult raised under standard density

Treatment (Paternal)

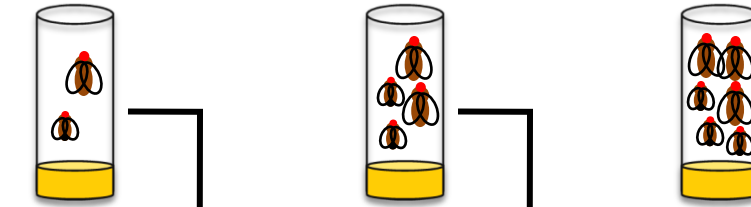

Mating with Un-treated dams

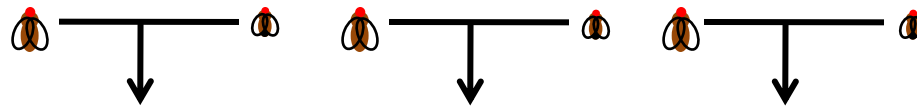

Egg collection From dams

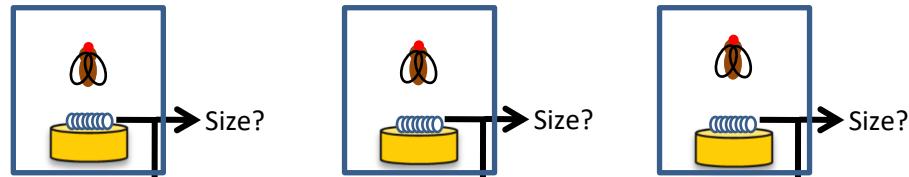

Juvenile fitness Adult fitness

Juvenile fitness Adult fitness

Progeny fitness assays

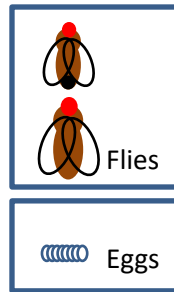

Juvenile Fitness Vials

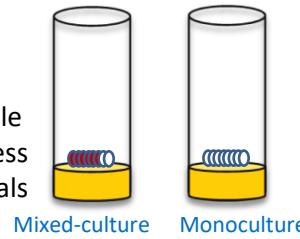

Crowded (C)  
Un-crowded (UC)

Sons

Adult fitness assays
